# Supplementary material for: BcGRP23: A novel gene involved in the chlorophyll metabolic pathway that is activated by BES1 in flowering Chinese cabbage
Source: PubMed Central journal article supplement (PMC9639331; doi:10.3389/fpls.2022.1010470), 2022-10-19
Supplement: DataSheet_1.pdf [file DataSheet_1.pdf]

*Supplementary Material*

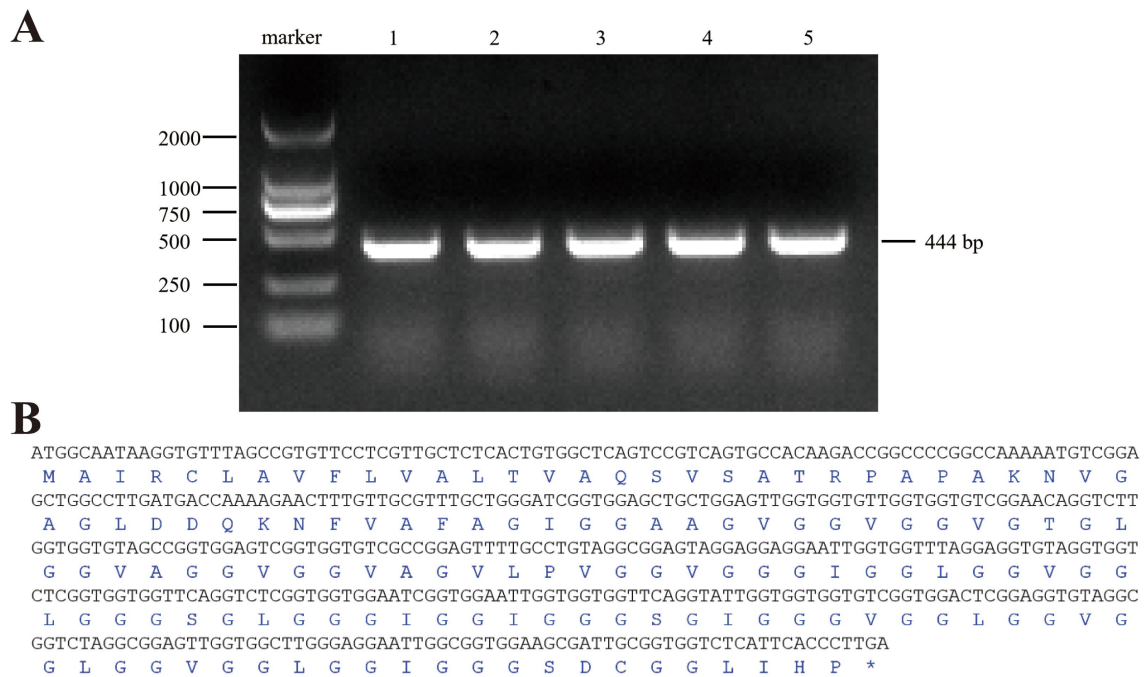

**Supplementary Figure 1.** Cloning of the *BcGRP23* gene. (A), PCR amplification electropherogram. DNA marker: DL2000; 1-5 are the largest ORF sequence fragments of BcGRP23. (B), BcGRP23 amino acid sequence.

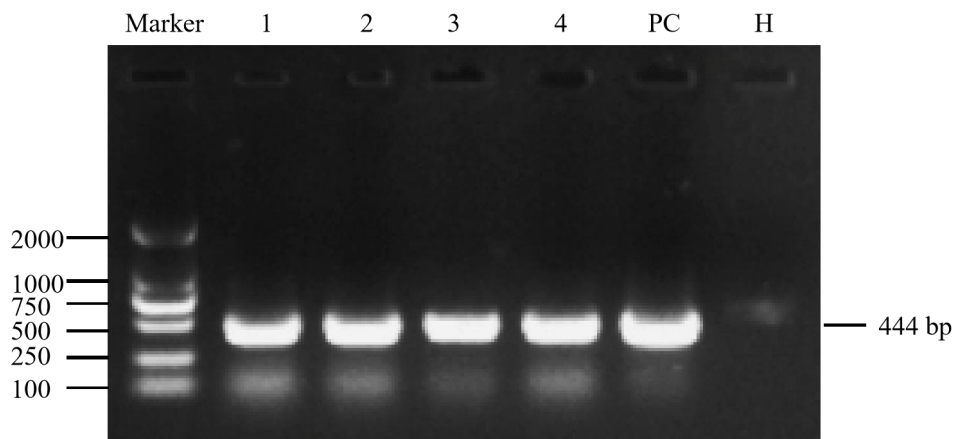

**Supplementary Figure 2.** Bacterial liquid PCR detection of pBI121-BcGRP23-GFP. Note: Maeker: DL2000 ; 1~4: pBI121-BcGRP23-GFP; PC: positive control; H: negative control. The gel size is 444bp.

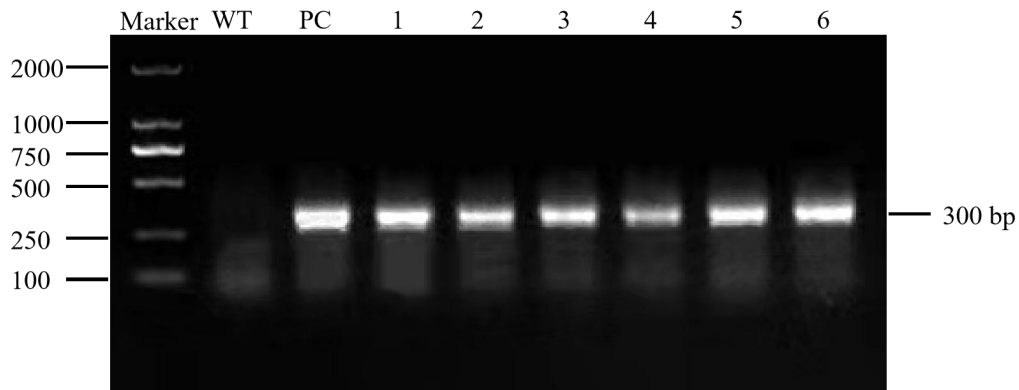

**Supplementary Figure 3.** Bacterial liquid PCR detection of pTRV2-BcGRP23.

Note: Marker: DL2000; 1~6: pTRV2-BcGRP23; PC: positive control; WT: negative control; The gel band size is 300 bp.

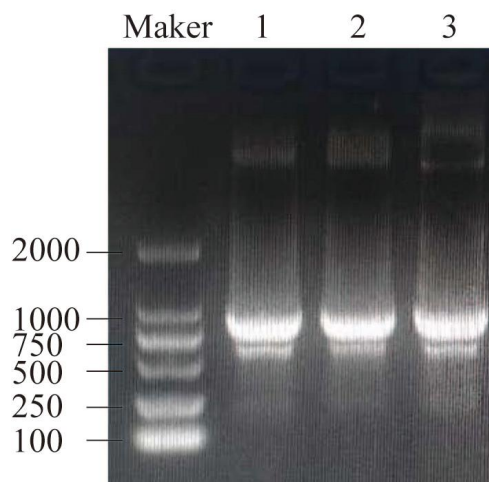

**Supplementary Figure 4.** Bacterial liquid PCR detection of CAMBIA1391-ProBcGRP23

Note: Marker: DL2000; 1~3: pCAMBIA1391-ProBcGRP23.

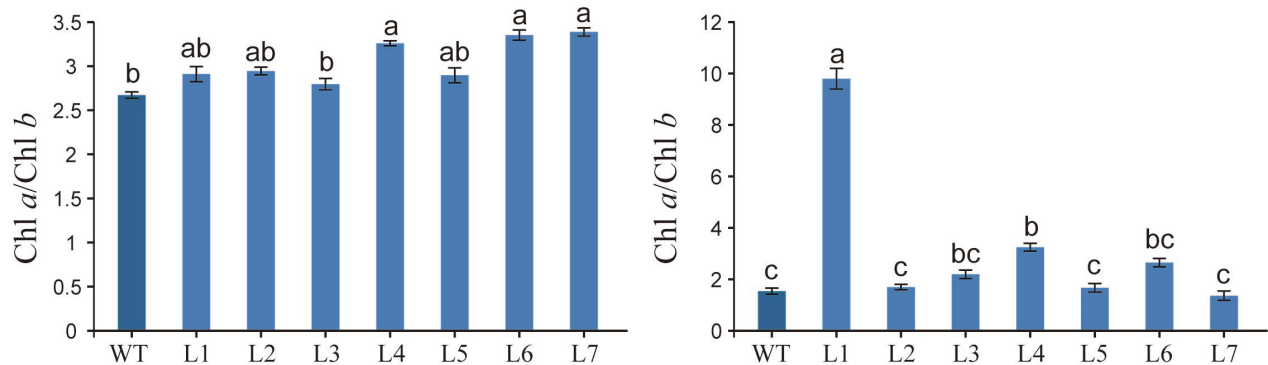

**Supplementary Figure 5.** The ratio of Chl *a* and Chl *b* (Chl *a*/*b*) in leaves (A) and petioles (B) of BcGRP23 knockdown lines. L1-L7 represent different BcGRP23 knockdown lines. Error bars represent standard errors. Different lowercase letters indicate significant differences at the  $P < 0.05$  level.

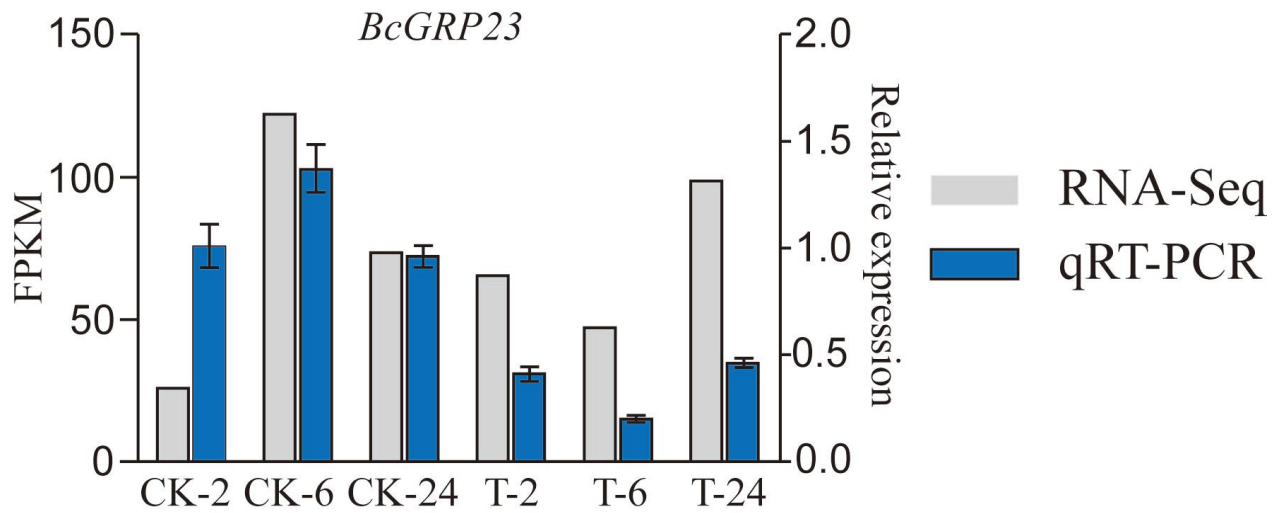

**Supplementary Figure 6.** The expression level of *BCGRP23* gene after PCZ (Propiconazole) treatment (83.3 mg/L). The left Y axis represents RNA-Seq results and the right Y axis represents the results of qRT-PCR. T-2: after 2 hours of treatment; T-6: after 6 hours of treatment; T-24: after 24 hours of treatment.

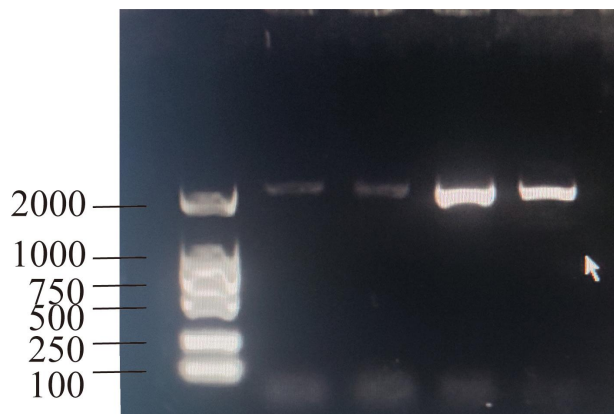

**Supplementary Figure 7.** Bacterial liquid PCR detection of pABAI-*ProBcGRP23*. The correct band size is: 1350 bp + insert size.

**Supplementary Table 1.** Analysis of cis-acting elements in the *BcGRP23* promoter

| Name              | Quantity | Sequence       | Function                                                          |
|-------------------|----------|----------------|-------------------------------------------------------------------|
| -10PEHVPSBD       | 3        | TATTCT         | light-responsive element                                          |
| ABRELATERD<br>1   | 1        | ACGTG          | ABA-responsive elements                                           |
| ABRERATCAL        | 1        | MACGYGB        | abscisic acid-responsive element                                  |
| ACGTATERD1        | 6        | ACGT           | drought-responsive element                                        |
| ARR1AT            | 13       | NGATT          | cytokinin-responsive element                                      |
| ASF1MOTIFCA<br>MV | 1        | TGACG          | salicylic acid-, auxin-responsive element                         |
| BIHD1OS           | 4        | TGTCA          | disease resistance-related response element                       |
| CAATBOX1          | 13       | CAAT           | elements that regulate transcription initiation frequency         |
| CACTFTPPCA1       | 32       | YACT           | mesophyll-specific regulatory elements                            |
| CARGCW8GAT        | 11       | CWWWWW<br>WWWG | self feedback element                                             |
| CATATGGMSA<br>UR  | 4        | CATATG         | auxin-responsive element                                          |
| CCAATBOX1         | 8        | CCAAT          | transcription factor associated with flowering gene transcription |
| CPBCSPOR          | 3        | TATTAG         | chlorophyll gene-related response elements                        |
| CURECORECR        | 12       | GTAC           | copper-inducible expression element                               |
| DOFCOREZM         | 15       | AAAG           | DOF gene binding site                                             |
| DPBFCOREDC<br>DC3 | 1        | ACACNNG        | abscisic acid-responsive element                                  |
| EBOXBNNAPA        | 8        | CANNTG         | brassinolide, a seed development regulatory element               |
| EECCRCAH1         | 2        | GANTTNC        | drought and osmotic stress response elements                      |
| ELRECOREPC<br>RP1 | 1        | TTGACC         | damage specific responsive element                                |
| ERELEE4           | 2        | AWTTCAA        | ethylene-responsive element                                       |
| GATABOX           | 26       | GATA           | light regulation, chlorophyll a/b binding element                 |

|                               |    |          |                                                    |
|-------------------------------|----|----------|----------------------------------------------------|
| GT1CONSENS<br>US              | 22 | GRWAAW   | light-regulated GT-1 factor conserved binding site |
| GT1CORE                       | 2  | GGTTAA   | light-responsive element                           |
| GT1GMSCAM4                    | 2  | GAAAAA   | salt regulatory element                            |
| GTGANTG10                     | 8  | GTGA     | pollen late gene promoter element                  |
| IBOX                          | 2  | GATAAG   | light-responsive element                           |
| IBOXCORE                      | 15 | GATAA    | light-responsive element                           |
| INRNTPSADB                    | 2  | YTCANTYY | initiation factor Inr element                      |
| LTRE1HVBLT4<br>9              | 2  | CCGAAA   | low temperature response element                   |
| MYB1AT                        | 12 | WAACCA   | ABA, Dehydration response element                  |
| MYB2CONSEN<br>SUSAT           | 2  | YAACKG   | drought response element                           |
| MYBCORE                       | 4  | CNGTTR   | dehydration, Light regulation related element      |
| MYBCOREATC<br>YCB1            | 4  | AACGG    | light regulation related element                   |
| MYBPLANT                      | 2  | MACCWAMC | ethylene,flower organ tissue specific element      |
| MYCCONSENS<br>USAT            | 8  | CANNTG   | cold stress specific element                       |
| NODCON2GM                     | 3  | CTCTT    | root tissue specific expression element            |
| NTBBF1ARRO<br>LB              | 2  | ACTTTA   | auxin induction related element                    |
| OSE2ROOTNO<br>DULE            | 3  | CTCTT    | junction-specific element                          |
| P1BS                          | 4  | GNATATNC | phosphorus deficiency response element             |
| POLASIG1                      | 6  | AATAAA   | polyadenylation site                               |
| POLLEN1LELA<br>T52            | 8  | AGAAA    | floral organ-specific element                      |
| PYRIMIDINEB<br>OXOSRAMY1<br>A | 1  | CCTTTT   | gibberellin response element                       |
| RAV1AAT                       | 6  | CAACA    | SA signaling pathway-related cis-element           |

|                       |    |           |                                                     |
|-----------------------|----|-----------|-----------------------------------------------------|
| REALPHALGL<br>HCB21   | 7  | AACCAA    | light regulatory element                            |
| REBETALGLH<br>CB21    | 3  | CGGATA    | light regulatory element                            |
| RHERPATEXPA<br>7      | 2  | KCACGW    | root hair specific element                          |
| ROOTMOTIFT<br>APOX1   | 30 | ATATT     | root specific regulatory element                    |
| SEF1MOTIF             | 2  | ATATTTAWW | enhancer promoter                                   |
| SEF3MOTIFG<br>M       | 1  | AACCCA    | binding site for embryo-specific protein SEF3       |
| SEF4MOTIFG<br>M7S     | 3  | RTTTTTTR  | binding site for embryo-specific protein SEF4       |
| SREATMSD              | 2  | TTATCC    | sugar repressive element                            |
| SURECOREAT<br>SULTR11 | 2  | GAGAC     | sulfur deficiency response element                  |
| TAAAGSTKST<br>1       | 4  | TAAAG     | guard cell specific gene expression element         |
| TATABOX2              | 4  | TATAAAT   | promoter core element                               |
| TATABOX3              | 2  | TATTAAT   | promoter core element                               |
| TATABOX4              | 3  | TATATAA   | promoter core element                               |
| TATABOX5              | 6  | TTATTT    | promoter core element                               |
| TBOXATGAPB            | 2  | ACTTTG    | light regulatory element                            |
| WBBOXPCWRK<br>Y1      | 2  | TTTGACY   | defense response gene expression regulatory element |
| T/GBOXATPIN2          | 1  | AACGTG    | methyl jasmonate inducible element element.         |
| WBOXATNPR1            | 5  | TTGAC     | salicylic acid inducible element                    |
| WBOXHVISO1            | 2  | TGACT     | sugar response element                              |
| WBOXNTERF3            | 4  | TGACY     | injury-related element                              |
| WRKY71OS              | 9  | TGAC      | gibberellin-related element                         |

---

**Supplementary Table 2.** List of primers used in this study

| Primer name.                 | Primer sequence (5'-3').                                                                      |                                                  |
|------------------------------|-----------------------------------------------------------------------------------------------|--------------------------------------------------|
| GAPDH                        | F:CAGGTTTGG AATTGTCGAGG<br>R:GAGCTGTGGAAGCACCTTTC                                             | Internal reference gene                          |
| BcGRP23-DL                   | F:GCTGGCCTTGATGACCAAAA<br>R:CTACTCCGCCTACAGGCAAAA                                             | <i>BcGRP23</i> for qRT-PCR                       |
| BcGRP23-CDS                  | F:ATGGCAATAAGGTGTTTAGCC<br>R:TCAAGGGTGAATGAGACCAC                                             | Full-length amplification of <i>BcGRP23</i> CDS. |
| pBI121-BcGRP23               | F:CACGGGGGACTCTAGAATGGCAA<br>TAAGGTGTTTAGCC<br>R:TCCTTTACCCATCCCGGGAGGGT<br>GAATGAGACCAC      | <i>Xba</i> I and <i>Sma</i> I                    |
| pCAMBIA1391-ProBcGRP23       | F:CCGGCGCGCCAAGCTTTGATATT<br>TACAGTTTAGCAA<br>R:GGGGATCCGTCGACCTGCAGCAT<br>TGGGAGGTTTATATAGGA | <i>Hind</i> III and <i>Pst</i> I                 |
| pTRV2-BcGRP23                | F:CACGGGGGACTCTAGACCAATAC<br>CTGAACCACCACC<br>R:TCCTTTACCCATCCCGGGTGTGG<br>CTCAGTCCGTCAGTG    | <i>Xba</i> I and <i>Sma</i> I                    |
| GUS                          | F:TAATGTTCTGCGACGCTCACA<br>R:ATACCTGTTACCGACGACG<br>F:GGCCGCTCTAGAACTAGTGGATC                 | <i>GUS</i> gene for qRT-PCR                      |
| pGreen II -62-SK-BES1        | -CATGACAGCATCAGGAG<br>R:ATCGATAAGCTTGATATCGAATTC<br>TTAGCCGCGTCCTTTAGC                        | <i>Bam</i> H I and <i>Eco</i> R I                |
| pGreen II -0800-LUC-ProGRP23 | F:CACTATAGGGCGAATTGGGTACC<br>TGATATTTACAGTTTAGCAA<br>R:TTTATGTTTTTGGCGTCTTCCATC               | <i>Kpn</i> I and <i>Nco</i> I                    |

ATTGGGAGGTTTATATAGGA

F:CTTGAATTCGAGCTCGGTACCTA

pABAi-ProGRP23

AGGTAACATGAGATACATATC

*Kpn* I and *Sal* I

R:AGCACATGCCTCGAGGTCGACG

CATAAGTTACGCAAAGGC

F:GGAGGCCAGTGAATTCGAGAAT

pGADT7-BcBES1

GACAGCATCAGGAGG

*EcoR* I and *BamH* I

R:CGAGCTCGATGGATCCCCTCTTA

GCCGCGTCCTTTAG

---



**Supplementary Table 3.** List of primers for genes related to chlorophyll synthesis and degradation in flowering Chinese cabbage

| Gene name     | Primer sequence (5'-3').   |
|---------------|----------------------------|
| <i>BcPORA</i> | F:CGGCGATGATAGATGGAGG      |
|               | R:AAGAGTGAACGGAAGAGAGGAATA |
| <i>BcPORB</i> | F:CGATGATTGATGGAGGAGATT    |
|               | R:GCAACCAGGGTAAAGCGAAG     |
| <i>BcPORC</i> | F:AAATCTGACTATCCATCAAAACG  |
|               | R:GCTCCATCATACTCTCCTCCA    |
| <i>BcCHLD</i> | F:GCACACCAGCAAACCTCTCTCA   |
|               | R:TCTTCGTCCTTATCACCTCCG    |
| <i>BcCAO</i>  | F:TGCGACAGAATCAGACAGACC    |
|               | R:AAGCAACGGGATACCAAAAAGT   |
| <i>BcPAO</i>  | F:CAGCTTCAGCGACTCACC       |
|               | R:TCGCCGTGCTCTTCTTCGAT     |
| <i>BcPPH</i>  | F:TATCTGATGCGCGGGTGGAT     |
|               | R:TTCCCGACCAATGCTGGACT     |
| <i>BcSGRI</i> | F:GTTGGGGTCCGCTTTGGGAA     |
|               | R:AATCGAGCTAACCTGCGGGA     |
| <i>BcNYC1</i> | F:TGCTTCTCCGGGCATGGTTC     |
|               | R:CTGTCCGCTTCCGCTGCATA     |
| <i>BcRCCR</i> | F:CTCGACCTCCCTCATCGCAA     |
|               | R:CGGACAAAGAGAGACGGCGA     |
